# Supplementary material for: Impact of Percent Body Fat on All-Cause Mortality among Adequate Dialysis Patients with and without Insulin Resistance: A Multi-Center Prospective Cohort Study
Source: MDPI journal article supplement (doi:10.3390/nu11061304), 2019-06-09
Supplement: s1 [file s1]

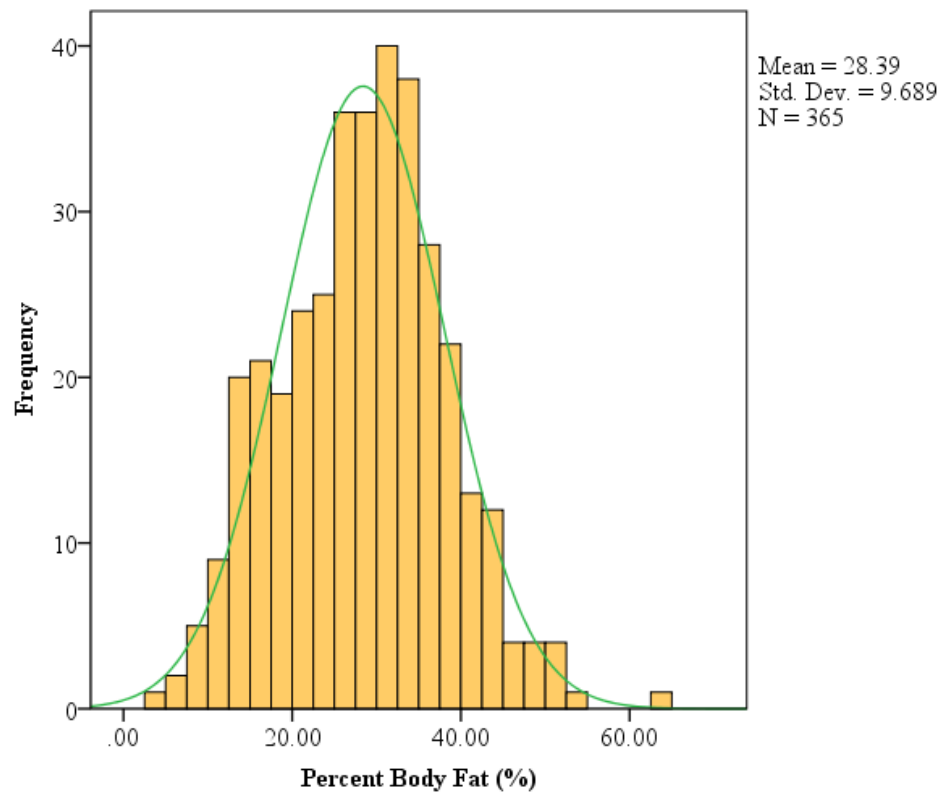

**Figure S1:** Distribution of percent body fat in hemodialysis patients
